# Supplementary material for: Guidance on Minimum Standards for Canine-Assisted Psychotherapy in Adolescent Mental Health: Delphi Expert Consensus on Health, Safety, and Canine Welfare
Source: MDPI journal article supplement (doi:10.3390/ani14050705), 2024-02-23
Supplement: s1 [file s1]

## Guidance on minimum standards for canine assisted psychotherapy in adolescent mental health:

### Delphi expert consensus on health, safety, and canine welfare.

**Table S1 – Supplementary Information**

#### Health & Safety

| R1 No.      | Round One Item                                                                                                                                                                                                       | %                         | Mean SD Median             | R2 No. | Round Two Item (where relevant) | % | Mean SD Median | Accepted |
|-------------|----------------------------------------------------------------------------------------------------------------------------------------------------------------------------------------------------------------------|---------------------------|----------------------------|--------|---------------------------------|---|----------------|----------|
| D1.2a<br>1a | Providers are trained in zoonotic infections, and methods to reduce risks                                                                                                                                            | E 0<br>I 100<br>N 0       | M=4.7<br>SD=0.5<br>Med=5.0 |        |                                 |   |                | Yes      |
| 1b          | Providers are first aid trained and qualified                                                                                                                                                                        | E 3.6<br>I 89.3<br>N 7.1  | M=4.4<br>SD=0.8<br>Med=5   |        |                                 |   |                | Yes      |
| 1c          | Providers are trained in canine first aid                                                                                                                                                                            | E 0<br>I 96.4<br>N 3.6    | M=4.4<br>SD=0.6<br>Med=4.0 |        |                                 |   |                | Yes      |
| 1d          | Providers are up to date with recommended (human) vaccinations (relevant to the geographic area and population group)                                                                                                | E 3.6<br>I 85.8<br>N 10.7 | M=4.4<br>SD=1.0<br>Med=5.0 |        |                                 |   |                | Yes      |
| 1e          | Any <i>minor human injury</i> (bite, scratch) is washed with soap and running water for 5 minutes (SHAE guidelines), then Medical or first aid care and incident reporting as required                               | E 3.6<br>I 89.3<br>N 7.1  | M=4.4<br>SD=0.9<br>Med=5.0 |        |                                 |   |                | Yes      |
| 1f          | Any <i>minor human injury</i> (bite, scratch) is washed with soap and running water for 45 seconds (in accordance with hand hygiene advice) followed by Medical or first aid care and incident reporting as required | E 0<br>I 96.3<br>N 3.7    | M=4.7<br>SD=0.6<br>Med=5.0 |        |                                 |   |                | Yes      |
| 1g          | Incident reporting includes review of risk, and future planning for risk management or mitigation                                                                                                                    | E 0<br>I 100<br>N 0       | M=4.9<br>SD=0.4<br>Med=5.0 |        |                                 |   |                | Yes      |

#### key

% - Percentage to E (exclude) I (include) or N (neither)

M= mean score and SD= standard deviation, where 1 is irrelevant and 5 is essential

Suggestions – Salient categories where 5 or more experts (N=5) made suggestions in the same category, topic or domain

Accepted – accepted for inclusion in the minimum standards, having reached consensus of 80% or greater as important (4) or essential (5) (approach consensus 70-70%, some support 60 – 69%)

Exclusion – having reached consensus of 80% or greater as irrelevant (1) or unimportant (2) (approaching consensus 70-70%, some support 60 – 69%)

## Guidance on minimum standards for canine assisted psychotherapy in adolescent mental health:

### Delphi expert consensus on health, safety, and canine welfare.

**Table S1 – Supplementary Information**

| R1 No. | Round One Item                                                                                                                                                                         | %                          | Mean SD Median             | R2 No. | Round Two Item (where relevant)                                                                                                                                                        | %                          | Mean SD Median             | Accepted |
|--------|----------------------------------------------------------------------------------------------------------------------------------------------------------------------------------------|----------------------------|----------------------------|--------|----------------------------------------------------------------------------------------------------------------------------------------------------------------------------------------|----------------------------|----------------------------|----------|
| 1h     | Incident reports are completed for all injuries to humans or animals (e.g., physical injury – scratch; psychological injury – fear)                                                    | E 0<br>I 92.9<br>N 7.1     | M=4.6<br>SD=0.6<br>Med=5.0 |        |                                                                                                                                                                                        |                            |                            | Yes      |
| 1i     | Incident reports are completed for all ‘near miss’ incidents (e.g., a situation where a canine or client intended or threatened to cause harm)                                         | E 0<br>I 92.9<br>N 7.1     | M=4.4<br>SD=0.6<br>Med=4.5 |        |                                                                                                                                                                                        |                            |                            | Yes      |
| 1j     | Canines are up to date on recommended vaccinations by a licensed veterinarian                                                                                                          | E 0<br>I 100<br>N 0        | M=4.9<br>SD=0.3<br>Med=5.0 |        |                                                                                                                                                                                        |                            |                            | Yes      |
| 1k     | Canines are up to date on internal and external parasite control (e.g., flicks, ticks, worms)                                                                                          | E 0<br>I 100<br>N 0        | M=4.9<br>SD=0.3<br>Med=5.0 |        |                                                                                                                                                                                        |                            |                            | Yes      |
| 1l     | Canines require regular vet checks and clearance when working (every 6-12 months)                                                                                                      | E 0<br>I 96.4<br>N 3.6     | M=4.8<br>SD=0.5<br>Med=5.0 |        |                                                                                                                                                                                        |                            |                            | Yes      |
| 1m     | Canines are prohibited from eating any raw animal product within 90 days prior to contact with clients                                                                                 | E 10.7<br>I 46.5<br>N 42.9 | M=3.6<br>SD=1.2<br>Med=3.0 | 1.1    | Canines are prohibited from eating any raw animal product within 90 days prior to contact with clients                                                                                 | E 41.4<br>I 29.4<br>N 29.4 | M=2.9<br>SD=1.5<br>Med=3.0 |          |
| 1n     | Canines do not work when obviously unwell (e.g., vomiting, diarrhoea)                                                                                                                  | E 0<br>I 100<br>N 0        | M=5.0<br>SD=0.2<br>Med=5.0 |        |                                                                                                                                                                                        |                            |                            | Yes      |
| 1o     | Canines do not work when on antibiotics or antimicrobials even if otherwise appearing well (e.g., prophylactic treatments, or to manage chronic/recurring conditions e.g., itchy ears) | E 14.8<br>I 55.5<br>N 29.6 | M=3.7<br>SD=1.3<br>Med=4.0 | 1.2    | Canines do not work when on antibiotics or antimicrobials even if otherwise appearing well (e.g., prophylactic treatments, or to manage chronic/recurring conditions e.g., itchy ears) | E 41.1<br>I 58.8<br>N 0    | M=3.2<br>SD=4.0<br>Med=1.5 |          |

#### **key**

% - Percentage to E (exclude) I (include) or N (neither)

M= mean score and SD= standard deviation, where 1 is irrelevant and 5 is essential

Suggestions – Salient categories where 5 or more experts (N=5) made suggestions in the same category, topic or domain

Accepted – accepted for inclusion in the minimum standards, having reached consensus of 80% or greater as important (4) or essential (5) (approach consensus 70-70%, some support 60 – 69%)

Exclusion – having reached consensus of 80% or greater as irrelevant (1) or unimportant (2) (approaching consensus 70-70%, some support 60 – 69%)

## Guidance on minimum standards for canine assisted psychotherapy in adolescent mental health:

### Delphi expert consensus on health, safety, and canine welfare.

**Table S1 – Supplementary Information**

| R1 No. | Round One Item                                                                                                                  | %                          | Mean SD Median             | R2 No. | Round Two Item (where relevant)                                                                      | %                          | Mean SD Median             | Accepted |
|--------|---------------------------------------------------------------------------------------------------------------------------------|----------------------------|----------------------------|--------|------------------------------------------------------------------------------------------------------|----------------------------|----------------------------|----------|
| 1p     | Canines do not work when obviously unhappy or displaying behavioural changes indicative of not wanting to engage in client work | E 0<br>I 100<br>N 0        | M=4.9<br>SD=0.3<br>Med=5.0 |        |                                                                                                      |                            |                            | Yes      |
| 1q     | Zoonotic clearance is obtained from a vet prior to return to work following illness                                             | E 0<br>I 82.2<br>N 17.9    | M=4.5<br>SD=0.8<br>Med=5.0 |        |                                                                                                      |                            |                            | Yes      |
| 1r     | Canines are screened for intestinal infections (e.g., salmonella) regularly (e.g., every 60-90 days)                            | E 14.2<br>I 46.4<br>N 39.3 | M=3.6<br>SD=1.2<br>Med=3.0 | 1.3    | Canines are screened for intestinal infections (e.g., salmonella) regularly (e.g., every 60-90 days) | E 41.2<br>I 47.0<br>N 11.8 | M=3.2<br>SD=1.5<br>Med=3.0 |          |
| 1s     | Canines with illness, injury or disability must obtain veterinary clearance prior to working with clients                       | E 3.6<br>I 87.5<br>N 10.7  | M=4.4<br>SD=0.8<br>Med=5.0 |        |                                                                                                      |                            |                            | Yes      |
| 1t     | Only sterilised (de-sexed, neutered, spayed) canines can work with clients                                                      | E 46.5<br>I 17.8<br>N 35.7 | M=2.5<br>SD=1.2<br>Med=3.0 | 1.4    | Only sterilised (de-sexed, neutered, spayed) canines can work with clients                           | E 41.2<br>I 29.4<br>N 0    | M=2.8<br>SD=1.5<br>Med=3.0 |          |
| 1u     | Canines must not work when on heat/in season                                                                                    | E 7.2<br>I 60.7<br>N 32.1  | M=4.0<br>SD=1.1<br>Med=4.0 | 1.5    | Canines must not work when on heat/in season                                                         | E 11.8<br>I 88.2<br>N 0    | M=4.4<br>SD=1.3<br>Med=5.0 | Yes      |
| 1v     | Canines are hydrobathed (shampoo down to the skin) within 24 hours prior to client contact                                      | E 39.3<br>I 21.4<br>N 39.3 | M=2.8<br>SD=1.3<br>Med=3.0 |        | Item redundant                                                                                       |                            |                            |          |
| 1w     | Canines are hydrobathed regularly (weekly to fortnightly)                                                                       | E 21.4                     | M=3.6                      |        | Item redundant                                                                                       |                            |                            |          |

#### **key**

% - Percentage to E (exclude) I (include) or N (neither)

M= mean score and SD= standard deviation, where 1 is irrelevant and 5 is essential

Suggestions – Salient categories where 5 or more experts (N=5) made suggestions in the same category, topic or domain

Accepted – accepted for inclusion in the minimum standards, having reached consensus of 80% or greater as important (4) or essential (5) (approach consensus 70-70%, some support 60 – 69%)

Exclusion – having reached consensus of 80% or greater as irrelevant (1) or unimportant (2) (approaching consensus 70-70%, some support 60 – 69%)

## Guidance on minimum standards for canine assisted psychotherapy in adolescent mental health:

### Delphi expert consensus on health, safety, and canine welfare.

**Table S1 – Supplementary Information**

| R1 No. | Round One Item                                                                                                                                                           | %                          | Mean SD Median             | R2 No.                | Round Two Item (where relevant)                                                                                                                                                 | %                          | Mean SD Median             | Accepted |
|--------|--------------------------------------------------------------------------------------------------------------------------------------------------------------------------|----------------------------|----------------------------|-----------------------|---------------------------------------------------------------------------------------------------------------------------------------------------------------------------------|----------------------------|----------------------------|----------|
|        |                                                                                                                                                                          | I 60.7<br>N 17.9           | SD=1.4<br>Med=4.0          | <i>Some support</i>   |                                                                                                                                                                                 |                            |                            |          |
| 1x     | <b>Canines are hydrobathed when obviously soiled or malodorous</b>                                                                                                       | E 7.1<br>I 85.7<br>N 7.1   | M=4.3<br>SD=1.1<br>Med=5.0 | Yes                   |                                                                                                                                                                                 |                            |                            |          |
| 1y     | <b>Canines are groomed (brushed/wiped) every workday, as required</b>                                                                                                    | E 3.6<br>I 92.8<br>N 3.6   | M=4.5<br>SD=0.7<br>Med=5.0 | Yes                   |                                                                                                                                                                                 |                            |                            |          |
| 1z     | <b>Clients use adequate hand hygiene before and after contact with the canine</b>                                                                                        | E 3.6<br>I 92.8<br>N 3.6   | M=4.5<br>SD=0.9<br>Med=5.0 | Yes                   |                                                                                                                                                                                 |                            |                            |          |
| 1aa    | Cross-contamination measures are taken between clients (e.g., use of antiseptic wipes) NOTE: Clients are working together in a group setting                             | E 3.6<br>I 75.0<br>N 21.4  | M=4.2<br>SD=1.0<br>Med=5.0 | 1.6                   | Cross-contamination measures are taken between clients (e.g., use of antiseptic wipes) NOTE: clients are working together in a group setting                                    | E 17.7<br>I 58.8<br>N 23.5 | M=3.8<br>SD=1.5<br>Med=5.0 |          |
| 1bb    | Cross-contamination measures are taken between GROUPS of clients (e.g., use of antiseptic wipes) I.e. the dog is wiped down prior to working with a new group of clients | E 7.4<br>I 77.7<br>N 14.8  | M=4.1<br>SD=1.1<br>Med=4.0 | 1.7                   | Cross-contamination measures should be taken between GROUPS of clients (e.g., use of antiseptic wipes). I.e. the dog is wiped down prior to working with a new group of clients | E 29.4<br>I 58.8<br>N 11.8 | M=3.3<br>SD=1.7<br>Med=4.0 |          |
| 1cc    | <b>Canines are prevented from licking the client's mouth or eyes</b>                                                                                                     | E 3.7<br>I 81.5<br>N 14.8  | M=4.3<br>SD=0.9<br>Med=5.0 | Yes                   |                                                                                                                                                                                 |                            |                            |          |
| 1dd    | Canines are prevented from licking clients at all                                                                                                                        | E 18.5<br>I 48.1<br>N 33.3 | M=3.6<br>SD=1.2<br>Med=3.0 | <i>Item redundant</i> |                                                                                                                                                                                 |                            |                            |          |

#### **key**

% - Percentage to E (exclude) I (include) or N (neither)

M= mean score and SD= standard deviation, where 1 is irrelevant and 5 is essential

Suggestions – Salient categories where 5 or more experts (N=5) made suggestions in the same category, topic or domain

Accepted – accepted for inclusion in the minimum standards, having reached consensus of 80% or greater as important (4) or essential (5) (approach consensus 70-70%, some support 60 – 69%)

Exclusion – having reached consensus of 80% or greater as irrelevant (1) or unimportant (2) (approaching consensus 70-70%, some support 60 – 69%)

## Guidance on minimum standards for canine assisted psychotherapy in adolescent mental health:

### Delphi expert consensus on health, safety, and canine welfare.

**Table S1 – Supplementary Information**

| R1 No.         | Round One Item                                                                                                                                                                                                                             | %                             | Mean SD Median             | R2 No. | Round Two Item (where relevant) | % | Mean SD Median | Accepted |
|----------------|--------------------------------------------------------------------------------------------------------------------------------------------------------------------------------------------------------------------------------------------|-------------------------------|----------------------------|--------|---------------------------------|---|----------------|----------|
| 1ee            | Clients are prevented from coming into contact with canine saliva, paws, ears, peri-anal region as they are potential infection sources (i.e., not allowed to feed, touch toys from dog's mouth, handle dog's face/ears, 'shake' paws etc) | E 46.4<br>I 25.0<br>N 28.6    | M=2.8<br>SD=1.4<br>Med=3.0 |        | <i>Item redundant</i>           |   |                |          |
| D1<br>1d<br>1p | <b>Risk assessment of venue/environment (e.g., hazards to humans or animals)</b>                                                                                                                                                           | E 0<br>I <b>100</b><br>N 0    | M=4.8<br>SD=0.5<br>Med=5.0 |        |                                 |   |                | Yes      |
| D1<br>1d<br>1q | <b>Risk assessment of client-animal interaction (e.g., suitability, zoonoses, physical harm)</b>                                                                                                                                           | E 0<br>I <b>97.0</b><br>N 3.0 | M=4.9<br>SD=0.3<br>Med=5.0 |        |                                 |   |                | Yes      |
| 2              | <b><u>Other Health and Safety Suggestions</u></b><br>None met inclusion criteria of n=5 per category                                                                                                                                       |                               |                            |        |                                 |   |                |          |

#### **key**

% - Percentage to E (exclude) I (include) or N (neither)

M= mean score and SD= standard deviation, where 1 is irrelevant and 5 is essential

Suggestions – Salient categories where 5 or more experts (N=5) made suggestions in the same category, topic or domain

Accepted – accepted for inclusion in the minimum standards, having reached consensus of 80% or greater as important (4) or essential (5) (approach consensus 70-70%, some support 60 – 69%)

Exclusion – having reached consensus of 80% or greater as irrelevant (1) or unimportant (2) (approaching consensus 70-70%, some support 60 – 69%)

## Guidance on minimum standards for canine assisted psychotherapy in adolescent mental health:

### Delphi expert consensus on health, safety, and canine welfare.

**Table S1 – Supplementary Information**

#### Welfare

| R1 No.      | Round One Item                                                                                                                                                                                  | %                          | Mean SD Median             | R2 No. | Round Two Item (where relevant)              | % | Mean SD Median | Accepted |
|-------------|-------------------------------------------------------------------------------------------------------------------------------------------------------------------------------------------------|----------------------------|----------------------------|--------|----------------------------------------------|---|----------------|----------|
| D1.2b<br>1a | Providers are trained in canine welfare and body language                                                                                                                                       | E 0<br>I 100<br>N 0        | M=4.8<br>SD=0.4<br>Med=5.0 |        |                                              |   |                | Yes      |
| 1b          | Welfare is informally assessed by provider observations during work                                                                                                                             | E 0<br>I 100<br>N 0        | M=4.7<br>SD=0.5<br>Med=5.0 |        |                                              |   |                | Yes      |
| 1c          | Canine welfare is regularly <i>assessed</i> and documented by provider observation (such as non-standardised questionnaires) kept in the canine's health record                                 | E 3.6<br>I 85.8<br>N 10.7  | M=4.2<br>SD=0.9<br>Med=4.0 |        |                                              |   |                | Yes      |
| 1d          | Welfare is regularly <i>assessed</i> with formal observational measures (e.g., video-recording and subsequent expert coding of stress; behavioural questionnaire from the PAT-WAT)              | E 7.2<br>I 53.6<br>N 39.3  | M=3.7<br>SD=1.0<br>Med=4.0 |        | <i>Item redundant</i>                        |   |                |          |
| 1e          | Canine welfare is regularly <i>assessed</i> and documented with standardised therapy dog welfare assessment tools (e.g., PAT-WAT) including behavioural coding and physiological testing        | E 17.8<br>I 60.7<br>N 21.4 | M=3.7<br>SD=1.2<br>Med=4.0 |        | <i>Item redundant</i><br><i>Some support</i> |   |                |          |
| 1f          | Canine welfare is <i>maintained</i> by adhering to strict guidelines, e.g., work duration of no more than one hour, rest breaks, recovery days (irrespective of individual canine differences). | E 11.5<br>I 61.5<br>N 26.9 | M=3.8<br>SD=1.2<br>Med=4.0 |        | <i>Item redundant</i><br><i>Some support</i> |   |                |          |
|             | If yes, please describe:<br>Welfare guidelines should be in place (5) and must be responsive to the individual dog/situation (5)                                                                |                            |                            |        |                                              |   |                |          |

#### key

% - Percentage to E (exclude) I (include) or N (neither)

M= mean score and SD= standard deviation, where 1 is irrelevant and 5 is essential

Suggestions – Salient categories where 5 or more experts (N=5) made suggestions in the same category, topic or domain

Accepted – accepted for inclusion in the minimum standards, having reached consensus of 80% or greater as important (4) or essential (5) (approach consensus 70-70%, some support 60 – 69%)

Exclusion – having reached consensus of 80% or greater as irrelevant (1) or unimportant (2) (approaching consensus 70-70%, some support 60 – 69%)

## Guidance on minimum standards for canine assisted psychotherapy in adolescent mental health:

### Delphi expert consensus on health, safety, and canine welfare.

**Table S1 – Supplementary Information**

|                |                                                                                                                                          |                                 |                            |                       |
|----------------|------------------------------------------------------------------------------------------------------------------------------------------|---------------------------------|----------------------------|-----------------------|
| 1g             | Canine welfare is <i>maintained</i> by flexible response to observed behaviour/wellbeing of the individual canine                        | E 3.6<br>I <b>89.2</b><br>N 7.1 | M=4.4<br>SD=0.8<br>Med=5.0 | Yes                   |
| 1h             | Canines are free to engage or disengage, or to rest (e.g., off lead) during sessions                                                     | E 3.7<br>I <b>96.3</b><br>N 0   | M=4.7<br>SD=0.7<br>Med=5.0 | Yes                   |
| 1i             | Human welfare (not safety) is given priority over animal welfare                                                                         | E 53.6<br>I 7.1<br>N 39.3       | M=2.2<br>SD=1.0<br>Med=2.0 | <i>Item redundant</i> |
| 1j             | Animal welfare (not safety) is given priority over human welfare                                                                         | E 40.7<br>I 22.2<br>N 37.0      | M=2.6<br>SD=1.2<br>Med=3.0 | <i>Item redundant</i> |
| 1k             | Human and animal welfare are given equal importance                                                                                      | E 0<br>I <b>96.4</b><br>N 3.6   | M=4.8<br>SD=0.5<br>Med=5.0 | Yes                   |
| D1<br>1d<br>1k | Clients and animals meeting under supervision to familiarise themselves <i>prior</i> to commencing therapy                               | E 33.3<br>I 57.6<br>N 9.1       | M=3.3<br>SD=1.3<br>Med=4.0 | <i>Item redundant</i> |
| D1<br>1d<br>1l | Client and animal familiarisation occurs <i>during</i> the initial phases of therapy, and is seen as integral to the therapeutic process | E 3.1<br>I <b>90.7</b><br>N 6.1 | M=4.4<br>SD=0.8<br>Med=5.0 | Yes                   |
| D1<br>1d<br>1m | Animal familiarisation with the venue, setting or location, <i>prior</i> to commencing client interactions                               | E 9.1<br>I <b>84.9</b><br>N 6.1 | M=4.2<br>SD=1.0<br>Med=4.0 | Yes                   |
| D1<br>1d<br>1n | Animal familiarisation with venue, setting or location can occur <i>simultaneously</i> with group therapy                                | E 35.5<br>I 48.4<br>N 16.1      | M=3.0<br>SD=1.5<br>Med=3.0 | <i>Item redundant</i> |

#### **key**

% - Percentage to E (exclude) I (include) or N (neither)

M= mean score and SD= standard deviation, where 1 is irrelevant and 5 is essential

Suggestions – Salient categories where 5 or more experts (N=5) made suggestions in the same category, topic or domain

Accepted – accepted for inclusion in the minimum standards, having reached consensus of 80% or greater as important (4) or essential (5) (approach consensus 70-70%, some support 60 – 69%)

Exclusion – having reached consensus of 80% or greater as irrelevant (1) or unimportant (2) (approaching consensus 70-70%, some support 60 – 69%)

## Guidance on minimum standards for canine assisted psychotherapy in adolescent mental health:

### Delphi expert consensus on health, safety, and canine welfare.

**Table S1 – Supplementary Information**

|                |                                                                                                                                       |                     |                            |     |
|----------------|---------------------------------------------------------------------------------------------------------------------------------------|---------------------|----------------------------|-----|
| D1<br>1d<br>1o | Suitability assessment of venue/environment (e.g., access, temperature, rest areas, ability for animals to express natural behaviour) | E 0<br>I 100<br>N 0 | M=4.8<br>SD=0.4<br>Med=5.0 | Yes |
| 2              | <u>Other Suggestions for Welfare</u><br>Nil met inclusion criteria of n=5 per category                                                |                     |                            |     |

#### **key**

% - Percentage to E (exclude) I (include) or N (neither)

M= mean score and SD= standard deviation, where 1 is irrelevant and 5 is essential

Suggestions – Salient categories where 5 or more experts (N=5) made suggestions in the same category, topic or domain

Accepted – accepted for inclusion in the minimum standards, having reached consensus of 80% or greater as important (4) or essential (5) (approach consensus 70-70%, some support 60 – 69%)

Exclusion – having reached consensus of 80% or greater as irrelevant (1) or unimportant (2) (approaching consensus 70-70%, some support 60 – 69%)
